# Supplementary material for: Mapping a Partial Andromonoecy Locus in Citrullus lanatus Using BSA-Seq and GWAS Approaches
Source: Front Plant Sci. 2020 Aug 19;11:1243. doi: 10.3389/fpls.2020.01243 (PMC7466658; doi:10.3389/fpls.2020.01243)
Supplement: Supplementary file 2 [file Table_1.xlsx]

## Sheet: Hoja 1
Supplementary Table 1. List of Citrullus lanatus accessions used in the present study and their origin, genotype for the CitACS4 gene and phenotypic data of the Andromonoecious Index (AI) in two locations.
Accession	Origin	Genotype for gene CitACS4	Andromonoecious index (AI)				Panel of 122 accessions for GWAS	Panel of 96 accessions for GWAS	Panel of 47 accessions for GWAS
			Open field evalution (Raleigh, North Carolina) Summer 2017	Greenhouse evaluation (Almería, Spain) Summer 2018	Range	Sex morphotype
P84	Inbred line	MM		1.55±0.23	1.43-1.80	PA
P86	Inbred line	MM		1.02±0.03	1.00-1.07	M
P87	Inbred line	mm		3.00±0.00	3.00-3.00	A
Calhoun Gray	Commercial	MM		1.58±0.62	1.00-2.40	PA
Charleston Gray	Commercial	MM	1±0.00	1.32±0.25	1.00-1.66	M
BGHZ0674	Spain, Badajoz	MM, Mm, mm		2.45±0.64	1.43-3.00	PA
BGHZ0675	Spain, Badajoz	MM, Mm, mm		1.56±0.83	1.00-3.00	PA
BGHZ0984	Spain, Badajoz	MM, Mm, mm		1.79±0.78	1.00-3.00	PA
BGHZ1254	Spain, Badajoz	MM, Mm, mm		1.87±0.71	1.10-2.88	PA
BGHZ1414	Spain, Badajoz	mm		3.00±0.00	3.00-3.00	A
BGHZ3027		MM		1.14±0.26	1.00-1.59	M
BGHZ4155	Spain, Badajoz	mm		3.00±0.00	3.00-3.00	A
BGHZ4156	Spain, Sevilla	MM, Mm, mm		1.59±0.47	1.00-2.38	PA
BGHZ4157	Spain, Córdoba	mm		2.98±0.06	2.88-3.00	A
BGHZ4636	Spain, Córdoba	MM, Mm, mm		2.29±0.70	1.50-3.00	PA
BGHZ4637	Spain, Córdoba	MM		1.15±0.18	1.00-1.50	M
BGHZ4847	Spain, Granada	MM		1.28±0.17	1.11-1.50	M
BGHZ4848	Spain, Granada	MM		1.00±0.00	1.00-1.13	M
BGHZ4849	Spain, Granada	MM		1.79±0.43	1.17-2.36	PA
BGHZ5064	Spain, Cádiz	MM		1.22±0.22	1.00-1.50	M
BGHZ5132	Spain, Cáceres	MM, Mm, mm		2.05±0.63	1.00-2.67	PA
BGHZ5248	Spain, Islas Baleares	MM, Mm, mm		2.98±0.04	2.91-3.00	A
BGHZ5249	Spain, Islas Baleares	MM, Mm, mm		2.60±0.27	2.17-2.90	PA
BGHZ5250	Spain, Islas Baleares	MM, Mm, mm		2.31±0.49	1.70-3.00	PA
BGHZ5251	Spain, Jaén	MM, Mm, mm		1.49±0.33	1.14-1.88	PA
BGHZ5252	Spain, Jaén	MM		1.37±0.23	1.15-1.88	PA
BGHZ5253	Spain, Jaén	MM, Mm, mm		1.41±0.58	1.00-2.20	PA
BGHZ5428	Spain, Huelva	MM, Mm, mm		1.34±0.27	1.00-1.60	M
BGHZ5441	Spain, Málaga	MM		1.96±0.38	1.44-2.50	PA
BGHZ5442	Spain, Málaga	MM		2.00±0.60	1.40-2.83	PA
BGHZ5443	Spain, Málaga	MM, Mm, mm		2.37±0.55	1.71-3.00	PA
BGHZ5622	Spain, Orense	MM, Mm, mm		1.19±0.19	1.00-1.46	M
BGHZ5623	Spain, Orense	MM		1.28±0.24	1.00-1.50	M
BGHZ5746	Spain, Granada	MM, Mm, mm		2.95±0.11	2.75-3.00	A
BGHZ5854	Spain, Huelva	MM		1.34±0.24	1.11-1.71	M
BGHZ5993	Spain, Huelva	MM		1.47±0.37	1.11-2.00	PA
BGHZ6020	Spain, Toledo	mm		3.00±0.00	3.00-3.00	A
BGV000743	Spain, Granada	MM, Mm, mm		2.60±0.89	1.00-3.00	PA
BGV000747	Spain, Cádiz	MM, Mm, mm		1.49±0.39	1.14-2.10	PA
BGV000754	Spain, Jaén	MM, Mm, mm		1.47±0.32	1.10-2.92	PA
BGV000762	Spain, Granada	mm		2.83±0.11	2.71-3.00	A
BGV000765	Spain, Huelva	MM, Mm, mm		3.00±0.00	3.00-3.00	A
BGV001875	Spain, Tarragona	MM		1.00±0.00	1.00-1.00	M
BGV001880	Spain, Girona	MM, Mm, mm		2.74±0.58	1.71-3.00	A
BGV001887	Spain, Girona	MM		1.47±0.38	1.00-2.00	PA
BGV002674	Spain, Las Palmas	MM		1.65±0.32	1.25-2.00	PA
BGV002712	Spain, Las Palmas	MM		1.00±0.00	1.00-1.22	M
BGV004081	Spain, Cáceres	MM, Mm, mm		2.93±0.11	2.75-3.00	A
BGV005163	Spain, Castellón	MM		1.19±0.13	1.00-1.33	M
BGV005264	Spain, Valencia	MM		1.11±0.25	1.00-1.67	M
BGV010408	Spain, Ciudad Real	mm		3.00±0.00	3.00-3.00	A
BGV016388		MM		1.11±0.24	1.00-1.55	M
Grif 5595	India	MM	1.00±0.00	1.32±0.04	1.00-1.00	M	XXXX	XXXX	XXXX
PI 163204	India, Punjab	MM, Mm, mm	2.00±1.00	2.43±0.62	1.59-2.71	PA	XXXX	XXXX	XXXX
PI 164992	Turkey, Ankara	MM	1.60±0.89	1.86±0.12	1.61-2.00	PA	XXXX	XXXX	XXXX
PI 164998	Turkey, Ankara	MM	1.40±0.89	1.00±0.00	1.00-1.00	M	XXXX	XXXX	XXXX
PI 166993	Turkey, Hatay	mm	2.80±0.45	3.00±0.00	3.00-3.00	A	XXXX	XXXX
PI 169235	Turkey, Manisa	mm	2.63±0.74	3.00±0.00	3.00-3.00	A	XXXX	XXXX
PI 169243	Turkey, Antalya	mm	3.00±0.00	2.98±0.06	2.88-3.00	A	XXXX	XXXX
PI 169254	Turkey, Izmir	MM, Mm, mm	3.00±0.00	2.25±0.87	1.00-3.00	PA
PI 169270	Turkey, Kirklareli	mm	3.00±0.00	2.95±0.11	2.75-3.00	A	XXXX	XXXX
PI 169281	Turkey	mm	2.43±0.98	3.00±0.00	3.00-3.00	A	XXXX	XXXX
PI 169287	Turkey, Bursa	mm	3.00±0.00	3.00±0.00	3.00-3.00	A	XXXX	XXXX
PI 169300	Turkey, Hatay	mm	2.00±1.00	3.00±0.00	3.00-3.00	A	XXXX	XXXX
PI 172803	Turkey, Maras	mm	2.75±0.71	3.00±0.00	3.00-3.00	A	XXXX	XXXX
PI 174099	Turkey, Elazig	mm	2.71±0.76	3.00±0.00	3.00-3.00	A	XXXX	XXXX
PI 174109	Turkey, Elazig	mm	2.20±1.10	3.00±0.00	3.00-3.00	A	XXXX	XXXX
PI 175665	Turkey, Kayseri	mm	2.67±0.82	3.00±0.00	3.00-3.00	A	XXXX	XXXX
PI 175651	Turkey, Balikesir	mm	3.00±0.00	2.98±0.04	2.91-3.00	A	XXXX	XXXX
PI 176487	Turkey, Tunceli	mm	2.60±0.55	2.85±0.29	2.33-3.00	A	XXXX	XXXX
PI 176490	Turkey, Sivas	MM, Mm, mm	1.40±0.89	2.62±0.58	2.29-3.00	PA
PI 176495	Turkey, Konya	mm	3.00±0.00	2.81±0.36	2.18-3.00	A
PI 176915	Turkey, Konya	mm	3.00±0.00	3.00±0.00	3.00-3.00	A	XXXX	XXXX
PI 177325	Turkey, Hakkari	MM	2.14±1.07	1.39±0.10	1.00-1.58	PA	XXXX	XXXX	XXXX
PI 178872	Turkey, Kutahya	mm	2.20±1.10	3.00±0.00	3.00-3.00	A	XXXX	XXXX
PI 178876	Turkey, Bursa	MM, Mm, mm	3.00±0.00	2.52±0.96	1.38-3.00	PA
PI 179234	Turkey, Bursa	mm	2.33±1.03	3.00±0.00	3.00-3.00	A	XXXX	XXXX
PI 179242	Iraq	MM	2.17±0.98	1.36±0.10	1.00-1.55	PA	XXXX	XXXX	XXXX
PI 182177	Turkey, Kirklareli	mm	3.00±0.00	3.00±0.00	3.00-3.00	A	XXXX	XXXX
PI 180426	India, Madhya Pradesh	mm	3.00±0.00	2.87±0.18	2.65-3.00	A	XXXX	XXXX
PI 183673	India, Maharashtra	MM, Mm, mm	1.00±0.00	1.88±0.79	1.00-2.91	PA
PI 185636	Ghana	MM, Mm, mm	2.23±1.01	1.87±1.04	1.00-3.00	PA
PI 190050	Serbia	MM, Mm, mm	1.80±0.84	2.05±1.10	1.00-3.00	PA
PI 193490	Ethiopia	MM, Mm, mm	1.00±0.00	1.70±0.78	1.40-3.00	PA
PI 195928	Ethiopia	mm	2.36±0.84	3.00±0.00	3.00-3.00	A	XXXX	XXXX
PI 195562	Ethiopia	MM, Mm, mm	3.00±0.00	2.20±0.76	1.00-3.00	PA
PI 203551	United States, New Mexico	MM, Mm, mm	3.00±0.00	2.58±0.88	1.00-3.00	PA
PI 220779	Afghanistan	MM	1.50±0.84	1.40±0.14	1.00-1.72	PA	XXXX	XXXX	XXXX
PI 222713	Iran, Bakhtaran	mm	3.00±0.00	3.00±0.00	3.00-3.00	A	XXXX	XXXX
PI 228238	Israel	mm	2.60±0.89	3.00±0.00	3.00-3.00	A	XXXX	XXXX
PI 234603	New Zealand, Auckland Island	MM, Mm, mm	1.33±0.82	1.50±1.00	1.00-3.00	PA
PI 249559	Thailand	MM, Mm, mm	1.40±0.89	1.90±0.60	1.36-2.46	PA	XXXX	XXXX	XXXX
PI 254622	Sudan, Khartoum	mm	2.17±0.98	3.00±0.00	3.00-3.00	A	XXXX	XXXX
PI 255139	South Africa	MM, Mm, mm	2.80±0.45	2.04±0.39	1.00-2.63	PA	XXXX	XXXX	XXXX
PI 269679	Belize	MM, Mm, mm	1.00±0.00	1.80±0.53	1.00-2.17	PA
PI 260733	Sudan, Khartoum	mm	3.00±0.00	3.00±0.00	3.00-3.00	A	XXXX	XXXX
PI 266027	Venezuela, Aragua	MM	1.00±0.00	1.00±0.00	1.00-1.00	M
PI 274561	Portugal	mm	3.00±0.00	2.94±0.10	2.78-3.00	A	XXXX	XXXX
PI 276659	Russian Federation	mm	3.00±0.00	3.00±0.00	3.00-3.00	A	XXXX	XXXX
PI 277989	Turkey, Aydin	mm	3.00±0.00	2.61±0.52	1.80-3.00	PA
PI 277988	Turkey, Aydin	mm	2.60±0.89	2.99±0.03	2.94-3.00	A	XXXX	XXXX
PI 277990	Turkey, Aydin	MM, Mm, mm	3.00±0.00	2.35±0.67	1.00-2.33	PA	XXXX	XXXX	XXXX
PI 277993	Turkey, Bilecik	mm	2.83±0.41	3.00±0.00	3.00-3.00	A
PI 278002	Turkey, Bursa	mm	2.50±0.84	3.00±0.00	3.00-3.00	A	XXXX	XXXX
PI 306365	Gabon	MM, Mm, mm	1.00±0.00	1.00±0.00	1.00-1.00	M
PI 278006	Turkey, Gaziantep	mm	3.00±0.00	3.00±0.00	3.00-3.00	A	XXXX	XXXX
PI 278008	Turkey, Gaziantep	mm	3.00±0.00	2.97±0.06	2.87-3.00	A	XXXX	XXXX
PI 278023	Turkey, Kars	MM, Mm, mm	1.40±0.89	1.55±0.27	1.00-1.99	PA	XXXX	XXXX	XXXX
PI 278030	Turkey, Kirsehir	mm	3.00±0.00	3.00±0.00	3.00-3.00	A	XXXX	XXXX
PI 357746	Former Serbia and Montenegro	MM	1.00±0.00	1.02±0.04	1.00-1.07	M	XXXX	XXXX	XXXX
PI 278055	Turkey, Tunceli	mm	3.00±0.00	3.00±0.00	3.00-3.00	A	XXXX	XXXX
PI 279460	Japan	MM, Mm, mm	2.43±0.98	1.92±0.67	1.00-2.67	PA	XXXX	XXXX	XXXX
PI 319236	Japan	MM, Mm, mm	1.20±0.45	1.47±0.20	1.00-1.86	PA	XXXX	XXXX	XXXX
PI 344066	Turkey, Gaziantep	mm	2.50±0.84	2.99±0.03	2.94-3.00	A	XXXX	XXXX
PI 357696	Macedonia	mm	1.20±0.45	3.00±0.00	3.00-3.00	A	XXXX	XXXX
PI 357678	Macedonia	mm	3.00±0.00	3.00±0.00	3.00-3.00	A	XXXX	XXXX
PI 357718	Macedonia	MM, Mm, mm	3.00±0.00	2.86±0.22	2.50-3.00	A	XXXX	XXXX
PI 357731	Macedonia	MM, Mm, mm	1.80±1.03	1.33±0.64	1.00-2.47	M
PI 368493	Macedonia	mm	2.60±0.89	2.88±0.20	2.58-3.00	A	XXXX	XXXX
PI 368496	Macedonia	MM, Mm, mm	3.00±0.00	1.73±0.77	1.38-3.00	PA
PI 368501	Macedonia	MM, Mm, mm	2.60±0.89	1.49±0.86	1.00-3.00	PA
PI 369220	Soviet Union, Former	mm	3.00±0.00	3.00±0.00	3.00-3.00	A	XXXX	XXXX
PI 183125	India, Maharashtra	mm	2.40±0.55	3.00±0.00	3.00-3.00	A
PI 494820	Zambia	mm	3.00±0.00	3.00±0.00	3.00-3.00	A	XXXX
PI 368512	Former Serbia and Montenegro	MM, Mm, mm	3.00±0.00	2.60±0.89	1.00-3.00	PA
PI 370424	Macedonia	MM, Mm, mm	1.40±0.89	1.36±0.08	1.00-1.51	PA	XXXX	XXXX	XXXX
PI 379237	Macedonia	MM	1.50±0.93	1.98±0.48	1.42-2.75	PA	XXXX	XXXX	XXXX
PI 379249	Macedonia	mm	3.00±0.00	3.00±0.00	3.00-3.00	A	XXXX	XXXX
PI 379257	Former Serbia and Montenegro	MM, Mm, mm	1.80±1.10	2.50±0.80	1.51-3.00	PA
PI 381705	India	MM, Mm, mm	1.00±0.00	1.60±0.35	1.00-1.83	PA	XXXX	XXXX	XXXX
PI 381711	India	MM, Mm, mm	1.00±0.00	1.60±0.39	1.00-1.89	PA	XXXX	XXXX	XXXX
PI 381715	India	MM, Mm, mm	1.00±0.00	1.75±1.09	1.00-3.00	PA
PI 435282	Iraq	MM	1.00±0.00	1.00±0.00	1.00-1.00	M	XXXX	XXXX	XXXX
PI 381733	India	mm	3.00±0.00	2.97±0.07	2.85-3.00	A	XXXX	XXXX
PI 381737	India	mm	2.60±0.89	2.98±0.06	2.88-3.00	A	XXXX	XXXX
PI 438675	Mexico, Chiapas	MM	1.00±0.00	1.00±0.00	1.00-1.00	M	XXXX	XXXX	XXXX
PI 458738	Paraguay, Chaco	MM, Mm, mm	1.00±0.00	1.00±0.00	1.00-1.00	M	XXXX	XXXX	XXXX
PI 459075	Botswana	mm	2.60±0.52	3.00±0.00	3.00-3.00	A	XXXX
PI 470249	Indonesia, Kalimantan	MM, Mm, mm	1.40±0.55	1.00±0.00	1.00-1.00	M	XXXX	XXXX	XXXX
PI 476325	Ukraine	mm	2.43±0.98	2.87±0.19	2.55-3.00	A	XXXX	XXXX
PI 482248	Zimbabwe	MM, Mm, mm	1.88±0.99	1.76±0.84	1.00-3.00	PA
PI 482269	Zimbabwe	mm	2.00±1.10	3.00±0.00	3.00-3.00	A	XXXX
PI 482275	Zimbabwe	mm	3.00±0.00	3.00±0.00	3.00-3.00	A	XXXX
PI 482281	Zimbabwe	mm	1.00±0.00	2.80±0.45	2.00-3.00	A	XXXX
PI 482295	Zimbabwe	mm	2.43±0.53	2.93±0.15	2.67-3.00	A	XXXX
PI 482305	Zimbabwe	mm	3.00±0.00	3.00±0.00	3.00-3.00	A	XXXX
PI 482320	Zimbabwe	mm	3.00±0.00	3.00±0.00	3.00-3.00	A	XXXX
PI 482330	Zimbabwe	mm	3.00±0.00	3.00±0.00	3.00-3.00	A	XXXX
PI 482337	Zimbabwe	mm	3.00±0.00	2.98±0.04	2.92-3.00	A	XXXX
PI 482346	Zimbabwe	mm	2.88±0.35	3.00±0.00	3.00-3.00	A	XXXX
PI 482349	Zimbabwe	mm	3.00±0.00	3.00±0.00	3.00-3.00	A	XXXX
PI 482350	Zimbabwe	mm	2.80±0.45	3.00±0.00	3.00-3.00	A	XXXX
PI 482359	Zimbabwe	mm	1.86±1.07	2.95±0.10	2.80-3.00	A	XXXX
PI 482364	Zimbabwe	mm	2.60±0.89	3.00±0.00	3.00-3.00	A	XXXX
PI 482365	Zimbabwe	mm	2.91±0.30	3.00±0.00	3.00-3.00	A	XXXX
PI 482371	Zimbabwe	mm	3.00±0.00	2.98±0.03	2.92-3.00	A	XXXX
PI 482376	Zimbabwe	mm	3.00±0.00	3.00±0.00	3.00-3.00	A	XXXX
PI 500301	Zambia	mm	3.00±0.00	3.00±0.00	3.00-3.00	A	XXXX
PI 500305	Zambia	mm	3.00±0.00	3.00±0.00	3.00-3.00	A	XXXX
PI 500311	Zambia	mm	3.00±0.00	2.97±0.06	2.86-3.00	A	XXXX
PI 500314	Zambia	MM, Mm, mm	1.40±0.89	1.40±0.09	1.00-1.53	PA	XXXX	XXXX	XXXX
PI 500345	Zambia	MM, Mm, mm	3.00±0.00	2.83±0.24	2.67-3.00	A	XXXX
PI 500349	Zambia	MM, Mm, mm	3.00±0.00	2.93±0.14	2.81-3.00	A	XXXX
PI 505587	Zambia	mm	2.78±0.67	2.95±0.11	2.75-3.00	A	XXXX
PI 505590	Zambia	mm	3.00±0.00	2.94±0.13	2.71-3.00	A	XXXX
PI 506439	Moldova	mm	2.20±1.10	3.00±0.00	3.00-3.00	A	XXXX
PI 507864	Hungary, Szabolcs-Szatmar	MM, Mm, mm	1.00±0.00	1.88±0.82	1.10-2.80	PA
PI 512342	Spain, Zaragoza	MM	1.29±0.76	1.36±0.06	1.00-1.45	PA	XXXX	XXXX	XXXX
PI 512349	Spain, Tarragona	MM	1.67±1.03	1.00±0.00	1.00-1.00	M	XXXX	XXXX	XXXX
PI 512352	Spain, Toledo	MM	2.67±0.82	1.47±0.27	2.00-1.00	PA	XXXX	XXXX	XXXX
PI 512358	Spain, Caceres	MM, Mm, mm	1.80±1.10	1.41±0.77	1.00-2.78	PA
PI 512373	Spain, Alicante	mm	2.00±1.00	2.88±0.21	2.64-3.00	A	XXXX	XXXX
PI 512401	Spain, Cadiz	MM	1.00±0.00	1.41±0.15	1.00-1.64	PA	XXXX	XXXX	XXXX
PI 512392	Spain, Castellon de Plana	MM, Mm, mm	3.00±0.00	2.06±0.89	1.44-3.00	PA
PI 512395	Spain, Valencia	MM	2.00±1.04	1.38±0.06	1.00-1.48	PA	XXXX	XXXX	XXXX
PI 512398	Spain, Granada	MM, Mm, mm	3.00±0.00	2.11±0.89	1.00-3.00	PA
PI 512403	Spain, Cadiz	mm	2.20±0.84	2.99±0.03	2.94-3.00	A	XXXX	XXXX
PI 525099	Egypt, Matruh	mm	3.00±0.00	2.62±0.53	1.90-3.00	PA
PI 532816	China	MM, Mm, mm	3.00±0.00	1.40±0.81	1.00-2.83	PA
PI 534532	Syria	mm	3.00±0.00	2.94±0.11	2.78-3.00	A	XXXX	XXXX
PI 534589	Syria	mm	3.00±0.00	2.98±0.04	2.90-3.00	A	XXXX	XXXX
PI 534593	Syria	mm	2.33±1.03	3.00±0.00	3.00-3.00	A	XXXX	XXXX
PI 537274	Pakistan, Punjab	mm	2.40±0.89	2.70±0.30	2.28-3.00	A	XXXX	XXXX
PI 537472	Spain, Alicante	MM	1.50±0.84	1.39±0.10	1.00-1.53	PA	XXXX	XXXX	XXXX
PI 556994	United States, Alabama	MM	2.20±1.10	1.02±0.03	1.00-1.06	M	XXXX	XXXX	XXXX
PI 593347	China, Henan	MM	2.60±0.89	1.37±0.03	1.33-1.44	PA	XXXX	XXXX	XXXX
PI 593350	China, Henan	MM	2.33±1.03	1.00±0.00	1.00-1.00	M	XXXX	XXXX	XXXX
PI 542118	Botswana	MM	2.60±0.89	1.00±0.00	1.00-1.00	M
PI 593351	China, Henan	MM, Mm, mm	1.00±0.00	1.40±0.89	1.00-3.00	PA
PI 593377	China, Xinjiang	MM	1.14±0.38	1.00±0.00	1.00-1.00	M	XXXX	XXXX	XXXX
PI 482343	Zimbabwe	mm	2.14±0.69	2.62±0.52	2.00-3.00	PA
PI 593384	China, Xinjiang	MM	2.20±1.10	1.01±0.03	1.00-1.06	M	XXXX	XXXX	XXXX
PI 595200	United States, Georgia	MM	1.00±0.00	1.00±0.00	1.00-1.00	M	XXXX	XXXX	XXXX
PI 595202	United States, Georgia	MM	1.00±0.00	1.32±0.05	1.00-1.41	M	XXXX	XXXX	XXXX
PI 600951	United States	MM	1.00±0.00	1.36±0.04	1.00-1.42	PA	XXXX	XXXX	XXXX
PI 601228	United States	MM	1.86±1.07	1.39±0.06	1.00-1.51	PA	XXXX	XXXX	XXXX
PI 612464	South Korea, Pusan	MM	1.14±0.38	1.37±0.04	1.00-1.44	PA	XXXX	XXXX	XXXX
PI 612468	South Korea, Pusan	MM, Mm, mm	1.00±0.00	1.43±0.09	1.00-1.55	PA	XXXX	XXXX	XXXX
PI 629109	United States, Colorado	MM	1.80±1.10	1.32±0.03	1.00-1.37	M	XXXX	XXXX	XXXX
PI 632754	Bulgaria	MM	1.00±0.00	1.37±0.07	1.00-1.51	PA	XXXX	XXXX	XXXX
PI 635610	United States, California	MM	1.00±0.00	1.32±0.06	1.00-1.45	M	XXXX	XXXX	XXXX
PI 635626	United States, California	MM	1.67±1.03	1.41±0.09	1.00-1.58	PA	XXXX	XXXX	XXXX
PI 635682	Argentina	MM, Mm, mm	1.00±0.00	1.47±0.20	1.00-1.89	PA	XXXX	XXXX	XXXX
PI 635712	United States, Mississippi	MM	1.00±0.00	1.00±0.00	1.00-1.00	M	XXXX	XXXX	XXXX
PI 658554	Turkmenistan	mm	2.80±0.63	3.00±0.00	3.00-3.00	A	XXXX	XXXX
PI 169260	United States, Mississippi	mm	2.40±0.89	3.00±0.00	3.00-3.00	A	XXXX	XXXX
PI 600962	Turkmenistan	MM	1.33±0.52	1.38±0.14	1.00-1.64	PA	XXXX	XXXX	XXXX
